# Supplementary material
Source: publisher figshare collection journal article supplement (https://acs.figshare.com/ndownloader/files/25032778)
Supplement: Supplementary file 1 [file 25032778]

# Supporting Information

## Solvent-Mediated Synthesis of Amorphous $\text{Li}_3\text{PS}_4/\text{PEO}$ Composite Solid Electrolytes with High $\text{Li}^+$ Conductivity

Ethan C. Self<sup>a†</sup>, Zachary D. Hood<sup>b†</sup>, Teerth Brahmhatt<sup>c</sup>, Frank M. Delnick<sup>a</sup>, Harry M. Meyer III<sup>d</sup>, Guang Yang<sup>a</sup>, Jennifer L. M. Rupp<sup>b, e</sup>, and Jagjit Nanda<sup>a\*</sup>

<sup>a</sup> Chemical Sciences Division, Oak Ridge National Laboratory, Oak Ridge, TN, 37831, USA

<sup>b</sup> Department of Materials Science and Engineering, Massachusetts Institute of Technology, Cambridge, MA, 02139, USA

<sup>c</sup> The Bredesen Center for Interdisciplinary Research and Graduate Education, The University of Tennessee, Knoxville, TN, 37996, USA

<sup>d</sup> Center for Nanophase Material Sciences, Oak Ridge National Laboratory, Oak Ridge, TN, 37831, USA

<sup>e</sup> Department of Electrical Engineering and Computer Science, Massachusetts Institute of Technology, Cambridge, MA 02139, USA

### Corresponding Author\* Emails:

[selfec@ornl.gov](mailto:selfec@ornl.gov) (E. C. Self)

[zhood@mit.edu](mailto:zhood@mit.edu) (Z. D. Hood)

[nandaj@ornl.gov](mailto:nandaj@ornl.gov) (J. Nanda)

† E. C. Self and Z. D. Hood contributed equally to this work.

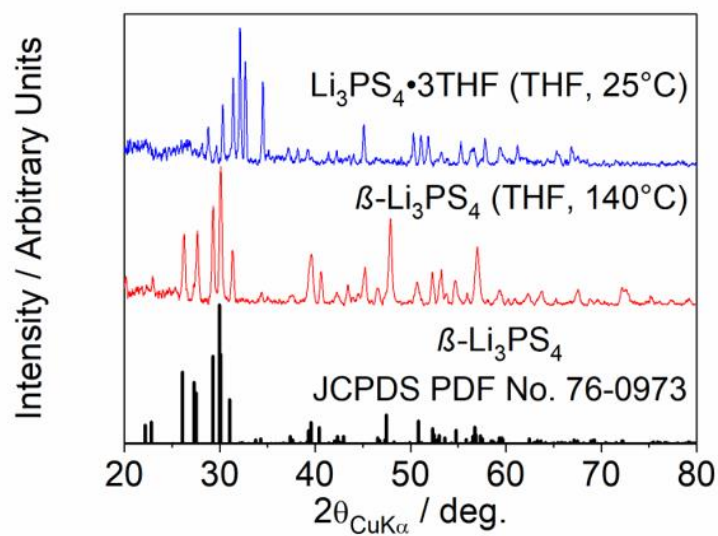

**Figure S1.** Powder XRD patterns of Li<sub>3</sub>PS<sub>4</sub> powders synthesized from THF dried under vacuum overnight at room temperature and 140 °C. Kapton background was manually subtracted.

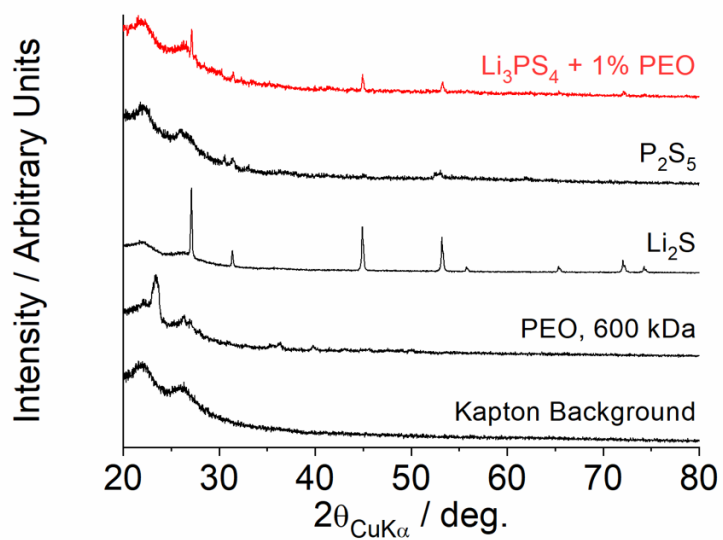

**Figure S2.** Powder XRD patterns of  $\text{Li}_3\text{PS}_4 + 1\% \text{ PEO}$ , precursor materials ( $\text{Li}_2\text{S}$ ,  $\text{P}_2\text{S}_5$ , and PEO), and Kapton tape used to mitigate sample exposure during XRD measurements.

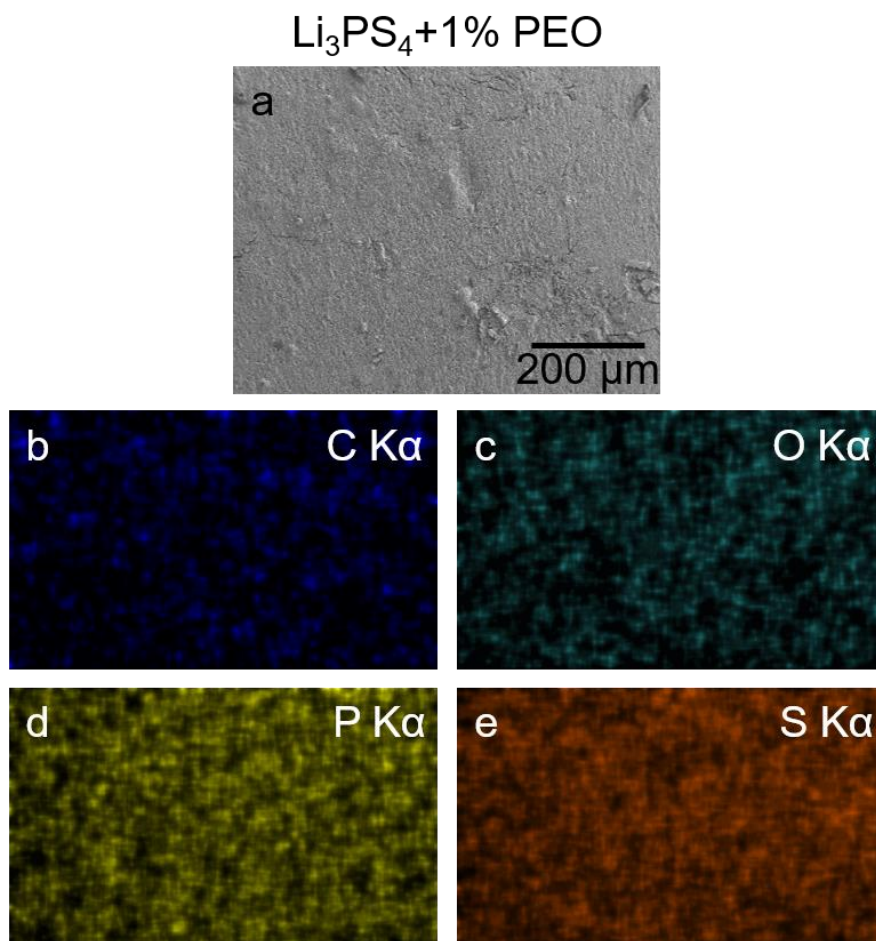

**Figure S3.** SEM image and corresponding EDX maps of an amorphous  $\text{Li}_3\text{PS}_4 + 1 \text{ wt.}\%$  PEO composite showing the elemental distribution of C/O (associated with PEO) and P/S (associated with  $\text{Li}_3\text{PS}_4$ ).

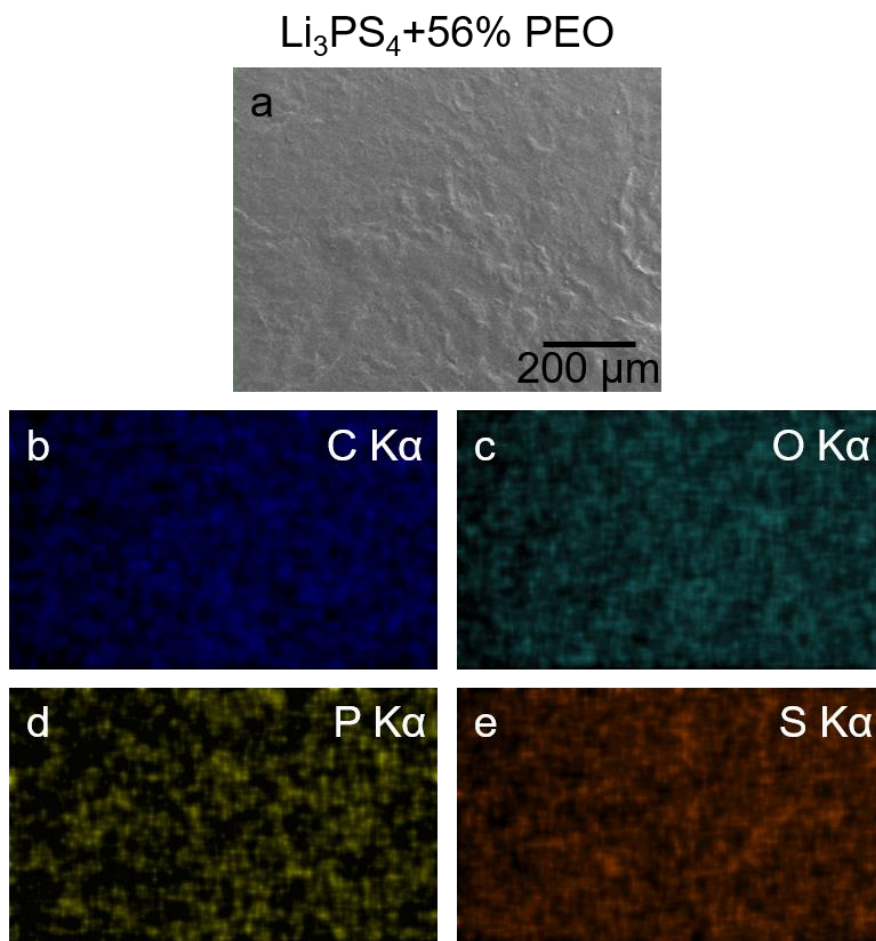

**Figure S4.** SEM image and corresponding EDX maps of an amorphous  $\text{Li}_3\text{PS}_4 + 56$  wt.% PEO composite showing the elemental distribution of C/O (associated with PEO) and P/S (associated with  $\text{Li}_3\text{PS}_4$ ).

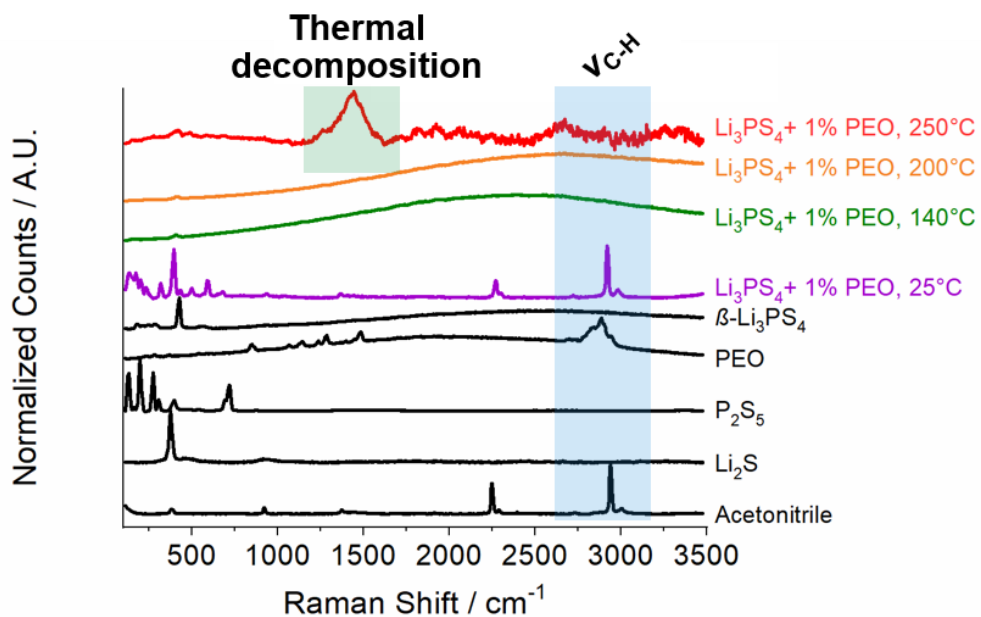

**Figure S5.** Raman spectra of  $\text{Li}_3\text{PS}_4 + 1 \text{ wt.}\% \text{ PEO}$  dried overnight at 25 – 250 °C. Fluorescence background was subtracted for the sample heated to 250 °C. Reference data for  $\beta\text{-Li}_3\text{PS}_4$  and precursor materials ( $\text{Li}_2\text{S}$ ,  $\text{P}_2\text{S}_5$ , PEO, and acetonitrile) are shown for comparison.

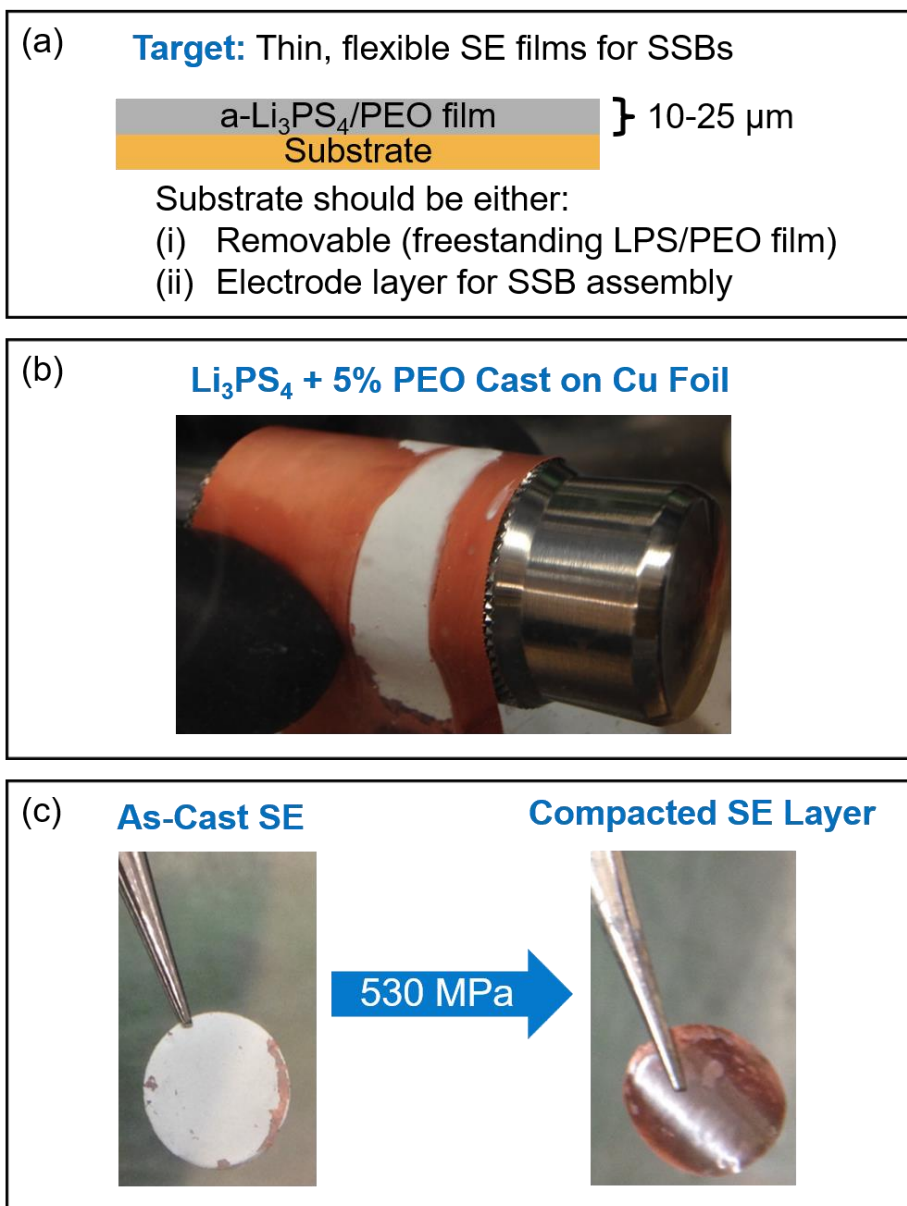

**Figure S6.** Preliminary investigations of slurry cast Li<sub>3</sub>PS<sub>4</sub>/PEO solid electrolytes showing (a) targeted structure containing a thin (10 – 25 μm) solid electrolyte layer deposited on a substrate, (b) Li<sub>3</sub>PS<sub>4</sub> + 5% PEO cast onto Cu foil, and (c) solid electrolyte disks (1/2" diameter) on Cu foil before and after cold-pressing at 530 MPa. Further optimization of the electrolyte and slurry composition is required before testing these thin solid electrolytes in all-solid-state batteries.

**Table S1.** Properties of the  $\text{Li}_3\text{PS}_4$  + 5% PEO SE layers cast onto Cu foil shown in Figure S6.

| Sample                 | Thickness ( $\mu\text{m}$ ) | Loading ( $\text{mg}/\text{cm}^2$ ) | Density ( $\text{g}/\text{cm}^3$ ) | Porosity* (%) |
|------------------------|-----------------------------|-------------------------------------|------------------------------------|---------------|
| As-Cast                | 32                          | 1.82                                | 0.57                               | 70            |
| Cold-Pressed (530 MPa) | 10                          | 1.82                                | 1.82                               | 3             |

\* Porosity estimated assuming a theoretical density of  $1.87 \text{ g}/\text{cm}^3$  for  $\beta\text{-Li}_3\text{PS}_4$ .
